# Supplementary material
Source: PubMed Central journal article supplement (PMC3413900)
Supplement: Supp_Fig1.pdf [file Supp_Fig1.pdf]

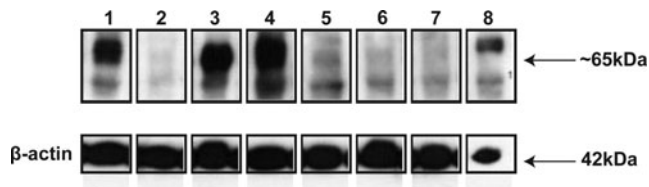

**SUPPLEMENTARY FIG. S1.** Protein analysis of tissue lysates from vector-treated and control NHPs. Western blot analysis indicated the presence of a 65-kDa protein band indicative of the mature enzyme and of similar molecular weight to the positive control (partially purified lysosomal hASM) detected only in vector-treated samples collected from the right thalamus region. Lanes containing lysates from thalamic regions are as follows: high dose (NHP 8, 9-month treatment; lane 1), low dose (NHP 4, 3-month treatment; lane 2), high dose (NHPs 5 and 6, 3-month treatment; lanes 3 and 4), controls (NHPs 2 and 1, 3-month treatment; lanes 5 and 6), low dose (NHP 3, 3-month treatment; lane 7), and low dose (NHP 7, 9-month treatment; lane 8).  $\beta$ -Actin was used as a housekeeping gene.
