# Supplementary material
Source: PubMed Central journal article supplement (PMC3413900)
Supplement: Supp_Fig3.pdf [file Supp_Fig3.pdf]

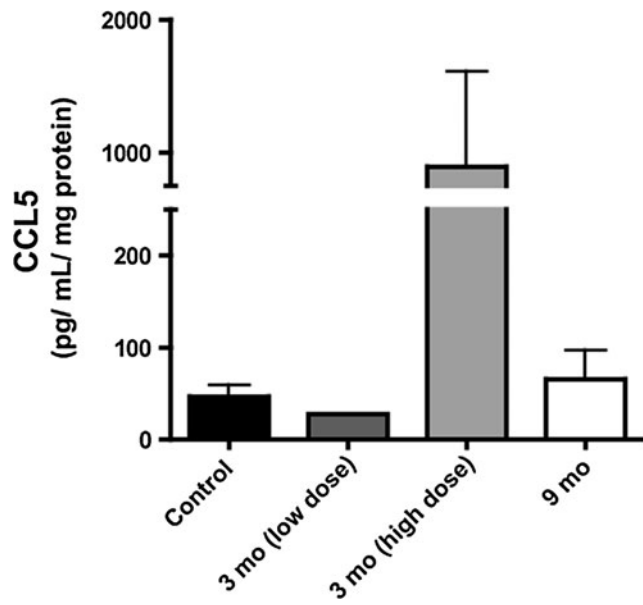

SUPPLEMENTARY FIG. S3. CCL5 upregulation after AAV2-hASM infusion. Brain homogenates of thalamic punches indicated an elevation in CCL5 in the high-dose vector-treated NHPs as compared with controls. Detection of this chemokine was most prominent in the 3-month survival group ( $n=2$  per group). Note a reduction in CCL5 levels in the 9-month treatment group.
