# Supplementary material
Source: PubMed Central journal article supplement (PMC3413900)
Supplement: Supp_Table.pdf [file Supp_Table.pdf]

SUPPLEMENTARY TABLE S1. SUMMARY OF NEUROLOGICAL ASSESSMENT AND CAGE-SIDE OBSERVATIONS

| <i>NHP group (survival)</i>  | <i>HD (9m)</i> | <i>HD (3m)</i> | <i>HD (3m)</i>     | <i>LD (9m)</i> | <i>LD (3m)</i> | <i>LD (3m)</i> | <i>Control</i> | <i>Control</i> |
|------------------------------|----------------|----------------|--------------------|----------------|----------------|----------------|----------------|----------------|
| Animal ID                    | NHP 8          | NHP 5          | NHP 6 <sup>a</sup> | NHP 7          | NHP 4          | NHP 3          | NHP 2          | NHP 1          |
| Paresis                      | -              | +              | +                  | -              | -              | -              | -              | -              |
| Locomotion                   | abN            | abN            | abN                | -              | abN            | -              | -              | -              |
| Skin abnormalities           | -              | -              | -                  | -              | +              | +              | -              | -              |
| Menace                       | -              | -              | -                  | -              | -              | -              | -              | -              |
| Pupil size                   | -              | -              | -                  | -              | -              | -              | -              | -              |
| Strabismus                   | -              | -              | -                  | -              | -              | -              | -              | -              |
| Facial symmetry              | -              | -              | -                  | -              | -              | -              | -              | -              |
| Vestibular: Head tilt        | -              | -              | -                  | -              | -              | -              | -              | -              |
| Nystagmus                    | -              | -              | -                  | -              | -              | -              | -              | -              |
| Gait                         | abN            | abN            | abN                | -              | -              | -              | -              | -              |
| Posture                      | abN            | abN            | abN                | -              | -              | -              | -              | -              |
| Other clinical abnormalities | +              | +              | +                  | +              | +              | -              | -              | -              |
| Weight loss                  | No             | No             | Yes                | No             | No             | Yes            | No             | No             |
| 5% below bsln <sup>b</sup>   | -              | -              | +                  | -              | -              | +              | -              | -              |
| 10% below bsln               | -              | -              | -                  | -              | -              | +              | -              | -              |
| 15% below bsln               | -              | -              | -                  | -              | -              | +              | -              | -              |
| Blood results                | - <sup>c</sup> | + <sup>d</sup> | -                  | - <sup>c</sup> | + <sup>d</sup> | + <sup>d</sup> | - <sup>c</sup> | - <sup>c</sup> |

-, negative/normal; +, positive; abN, abnormal.

<sup>a</sup>Early necropsy.

<sup>b</sup>Baseline (bsln) weight is weight taken at implant surgery. Weight loss values were determined at necropsy.

<sup>c</sup>Within normal limits.

<sup>d</sup>Abnormal limits during the study.
